# Supplementary material for: Defining cellular complexity in human autosomal dominant polycystic kidney disease by multimodal single cell analysis
Source: PubMed Central journal article supplement (PMC9618568; doi:10.1038/s41467-022-34255-z), 2022-10-30
Supplement: 41467_2022_34255_MOESM1_ESM.pdf [file 41467_2022_34255_MOESM1_ESM.pdf]

## **Supplementary Information**

### **Defining cellular complexity in human autosomal dominant polycystic kidney disease by multimodal single cell analysis**

Yoshiharu Muto, Eryn E. Dixon, Yasuhiro Yoshimura, Haojia Wu, Kohei Omachi, Nicolas Ledru, Parker C. Wilson, Andrew J. King, N. Eric Olson, Marvin G. Gunawan, Jay J. Kuo, Jennifer Cox, Jeffrey H. Miner, Stephen L. Seliger, Owen M. Woodward, Paul A. Welling, Terry J. Watnick and Benjamin D. Humphreys

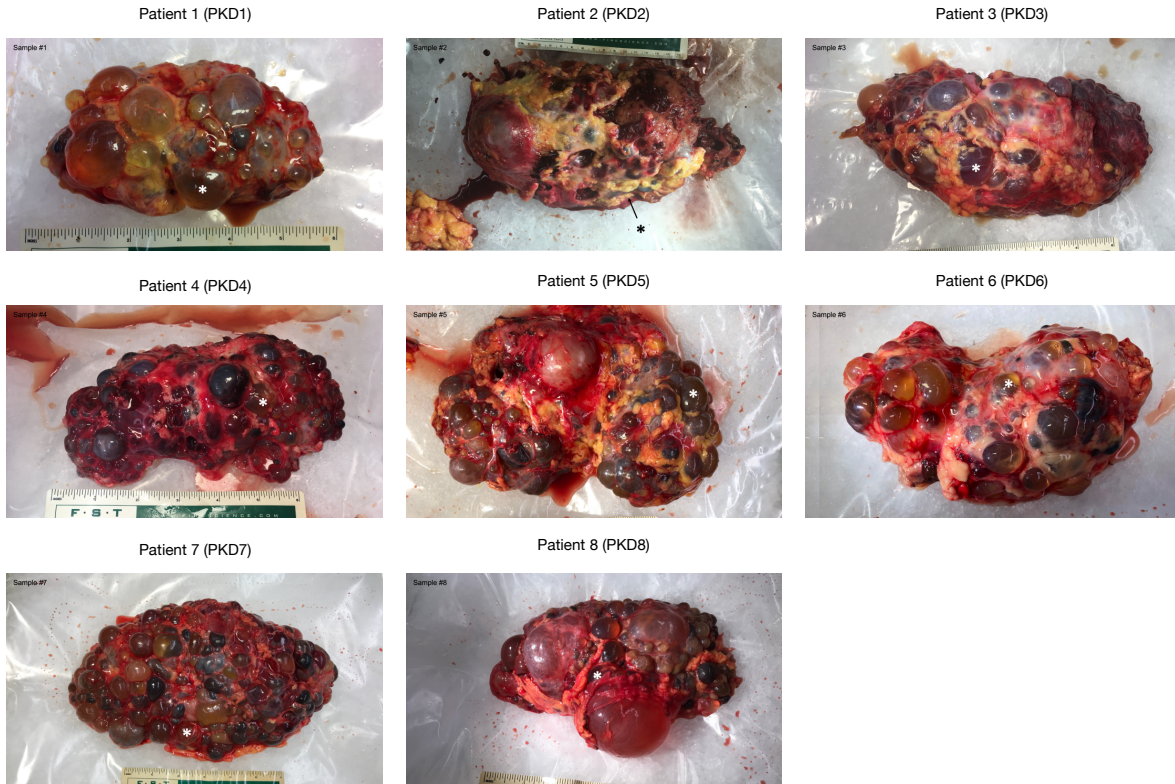

**Supplementary Figure 1. Gross appearance of ADPKD kidney samples used for single cell analysis**

ADPKD kidneys nephrectomized from ESKD patients. An asterisk (\*) indicates the cyst from which a sample for single cell analysis was collected in each patient.

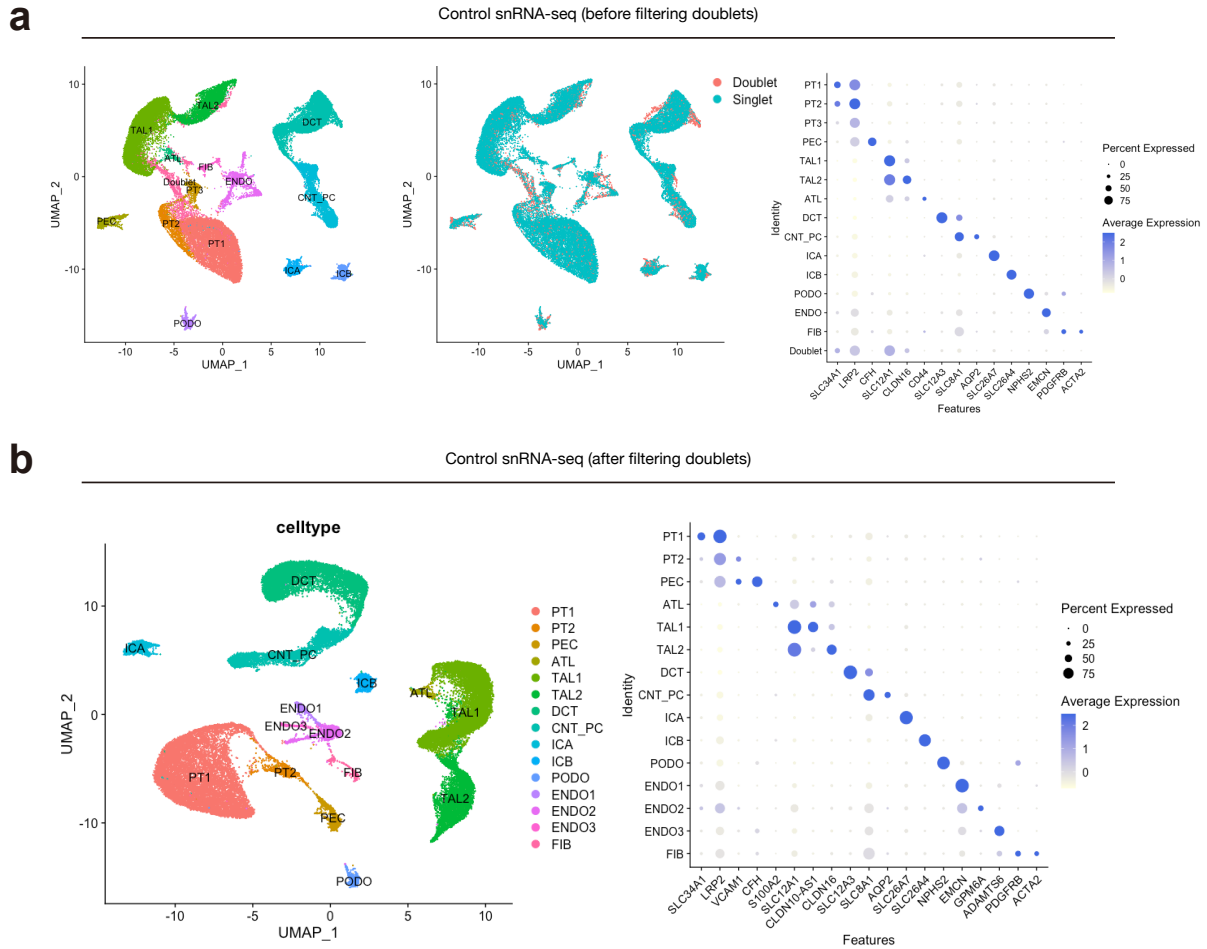

### Supplementary Figure 2. Single cell transcriptional profiling on the control kidneys

**(a)** UMAP plots of control snRNA-seq dataset before filtering out doublets. Annotation by cell type (left) or doublet prediction by DoubletFinder (middle). Dot plot showing gene expression patterns of cluster-enriched markers (right). **(b)** UMAP plots of control snRNA-seq dataset after filtering out doublets. Annotation by cell type (left). Dot plot showing gene expression patterns of cluster-enriched markers (right). The diameter of the dot corresponds to the proportion of cells expressing the indicated gene and the density of the dot corresponds to average expression relative to all cell types.

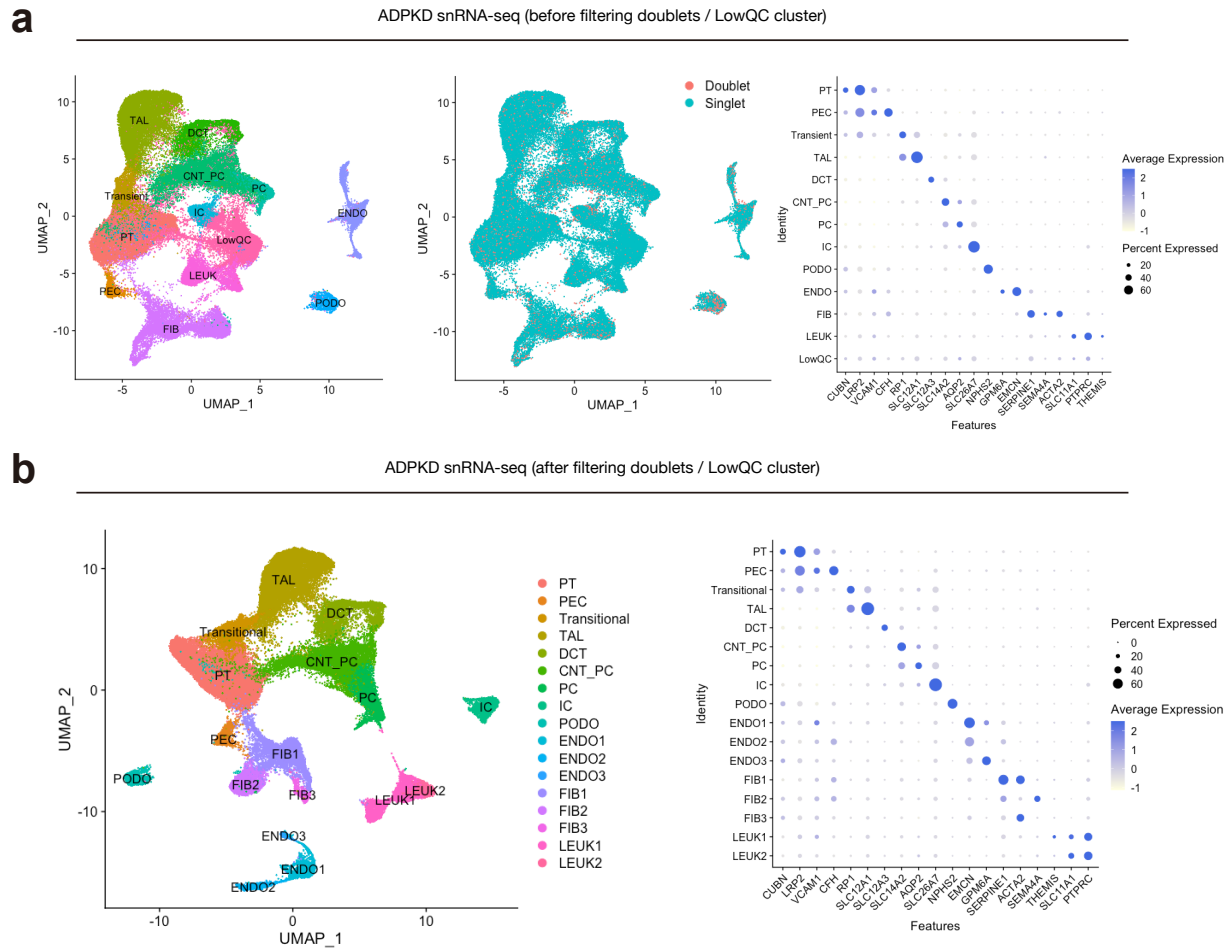

### Supplementary Figure 3. Single cell transcriptional profiling on the ADPKD kidneys

(a) UMAP plots of ADPKD snRNA-seq dataset before filtering out doublets and low quality (LowQC) cluster. Annotation by cell type (left) or doublet prediction by DoubletFinder (middle). Dot plot showing gene expression patterns of cluster-enriched markers (right). (b) UMAP plots of ADPKD snRNA-seq dataset after filtering out doublets and LowQC cluster. Annotation by cell type (left). Dot plot showing gene expression patterns of cluster-enriched markers (right). The diameter of the dot corresponds to the proportion of cells expressing the indicated gene and the density of the dot corresponds to average expression relative to all cell types.



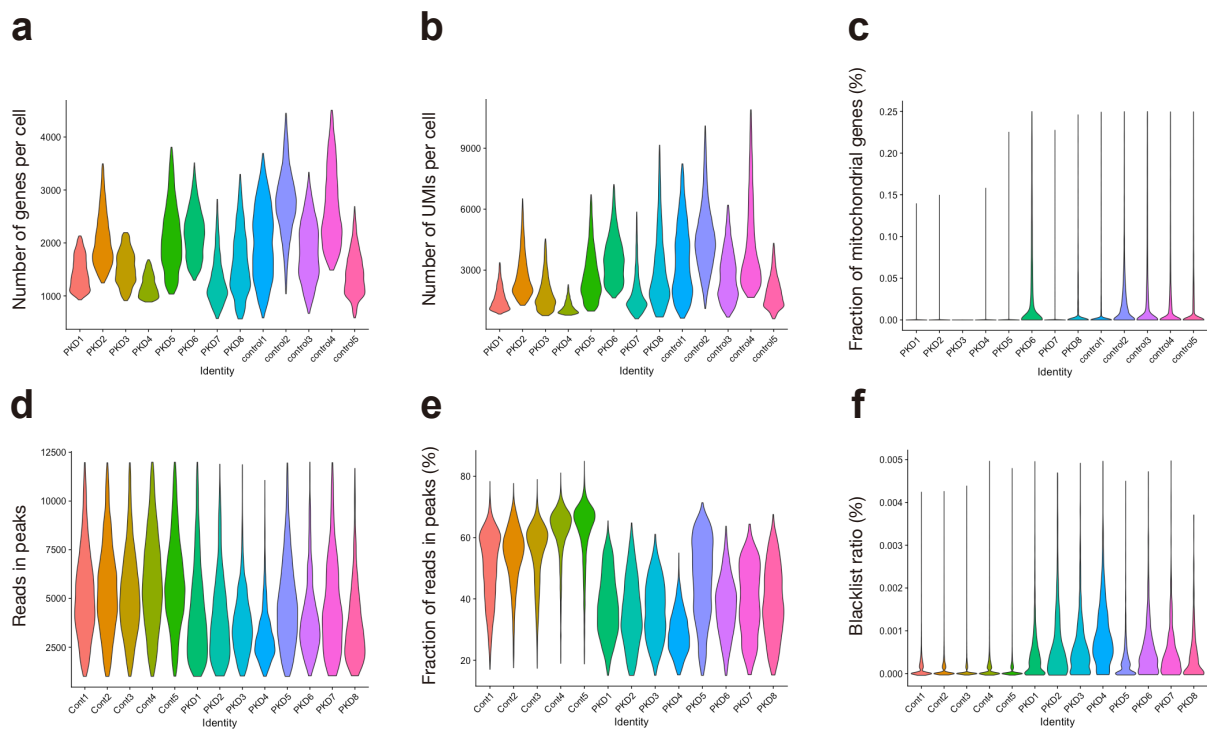

**Supplementary Figure 4. QC metrics for snRNA-seq or snATAC-seq dataset:** (a) Number of genes per cell, (b) number of UMIs per cell and (c) fraction of mitochondrial genes per cell in snRNA-seq data were shown. (d) Fraction of reads in peaks, (e) number of reads in peaks per cell and (f) ratio of reads in genomic blacklist region per cell in snATAC-seq data were shown.

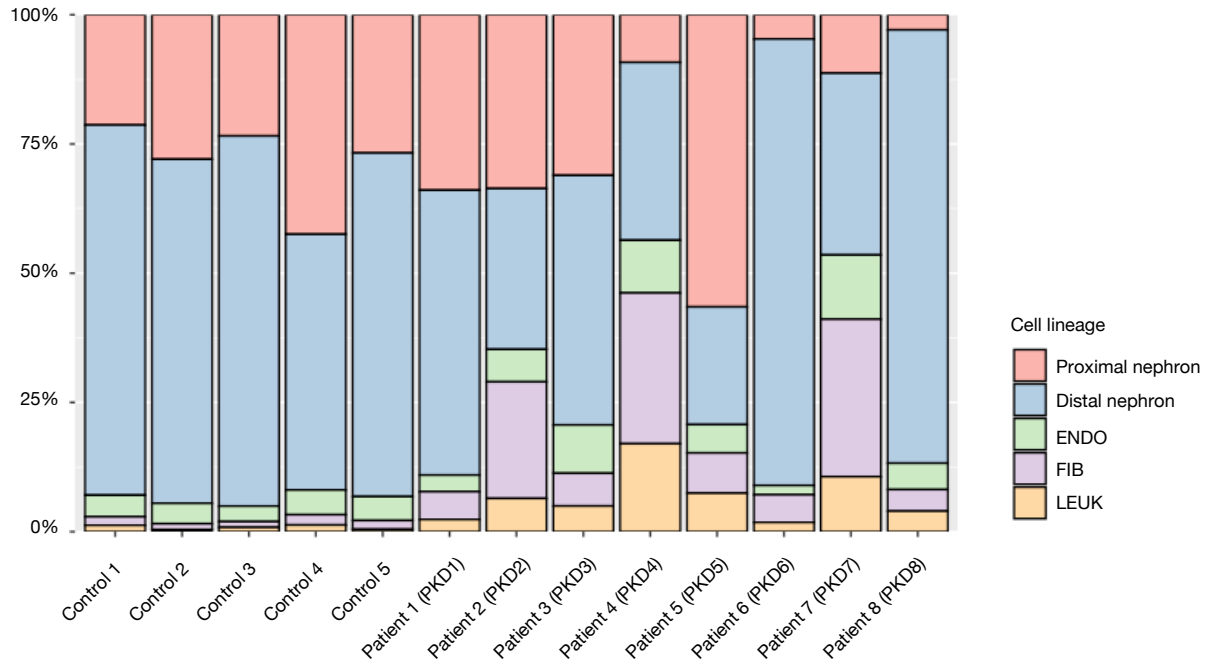

**Supplementary Figure 5. Proportion of cell lineages in each dataset:** The proportion of cell lineages in dataset from each sample in snRNA-seq. Proximal (PT, FR-PTC, PEC and PODO); Distal (TAL1, TAL2, DCT, CNT\_PC and IC). Source data are provided as a Source Data file.

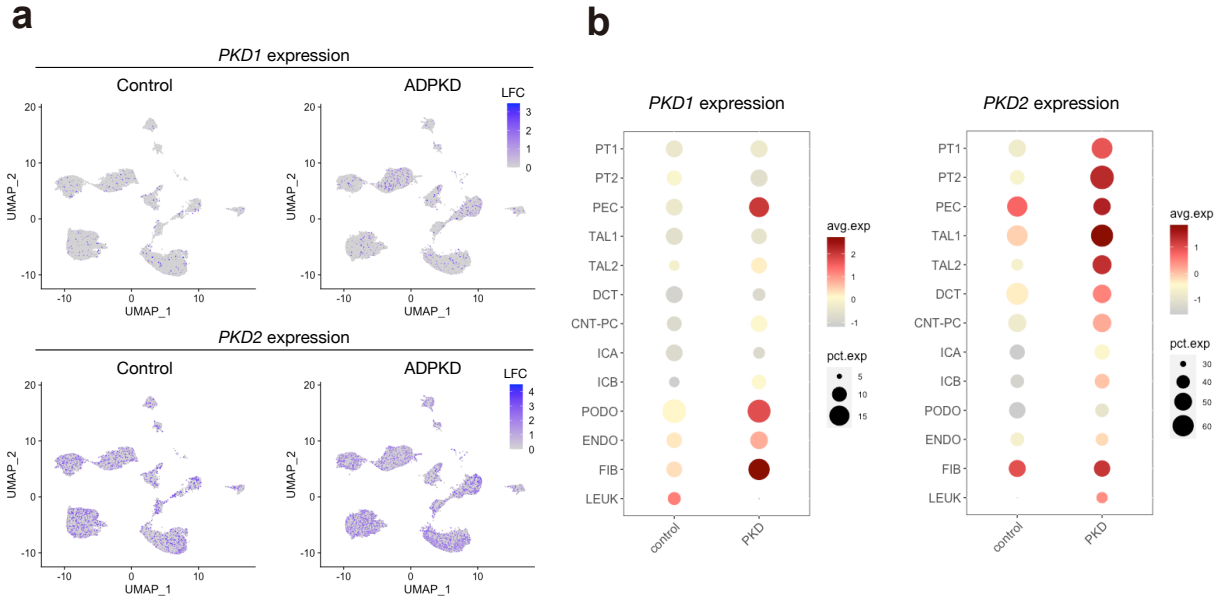

**Supplementary Figure 6. *PKD1* or *PKD2* gene expressions in ADPKD dataset.**

(a) UMAP plot displaying *PKD1* (upper panel) or *PKD2* (lower panel) gene expression in control or ADPKD dataset. The color scale for each plot represents a normalized log-fold-change (LFC). (b) Dot plot showing *PKD1* (left) or *PKD2* (right) gene expression in each celltype of control or ADPKD dataset. The diameter of the dot corresponds to the proportion of cells expressing the indicated gene (pct. exp) and the density of the dot corresponds to average expression relative to all celltypes (avg. exp).

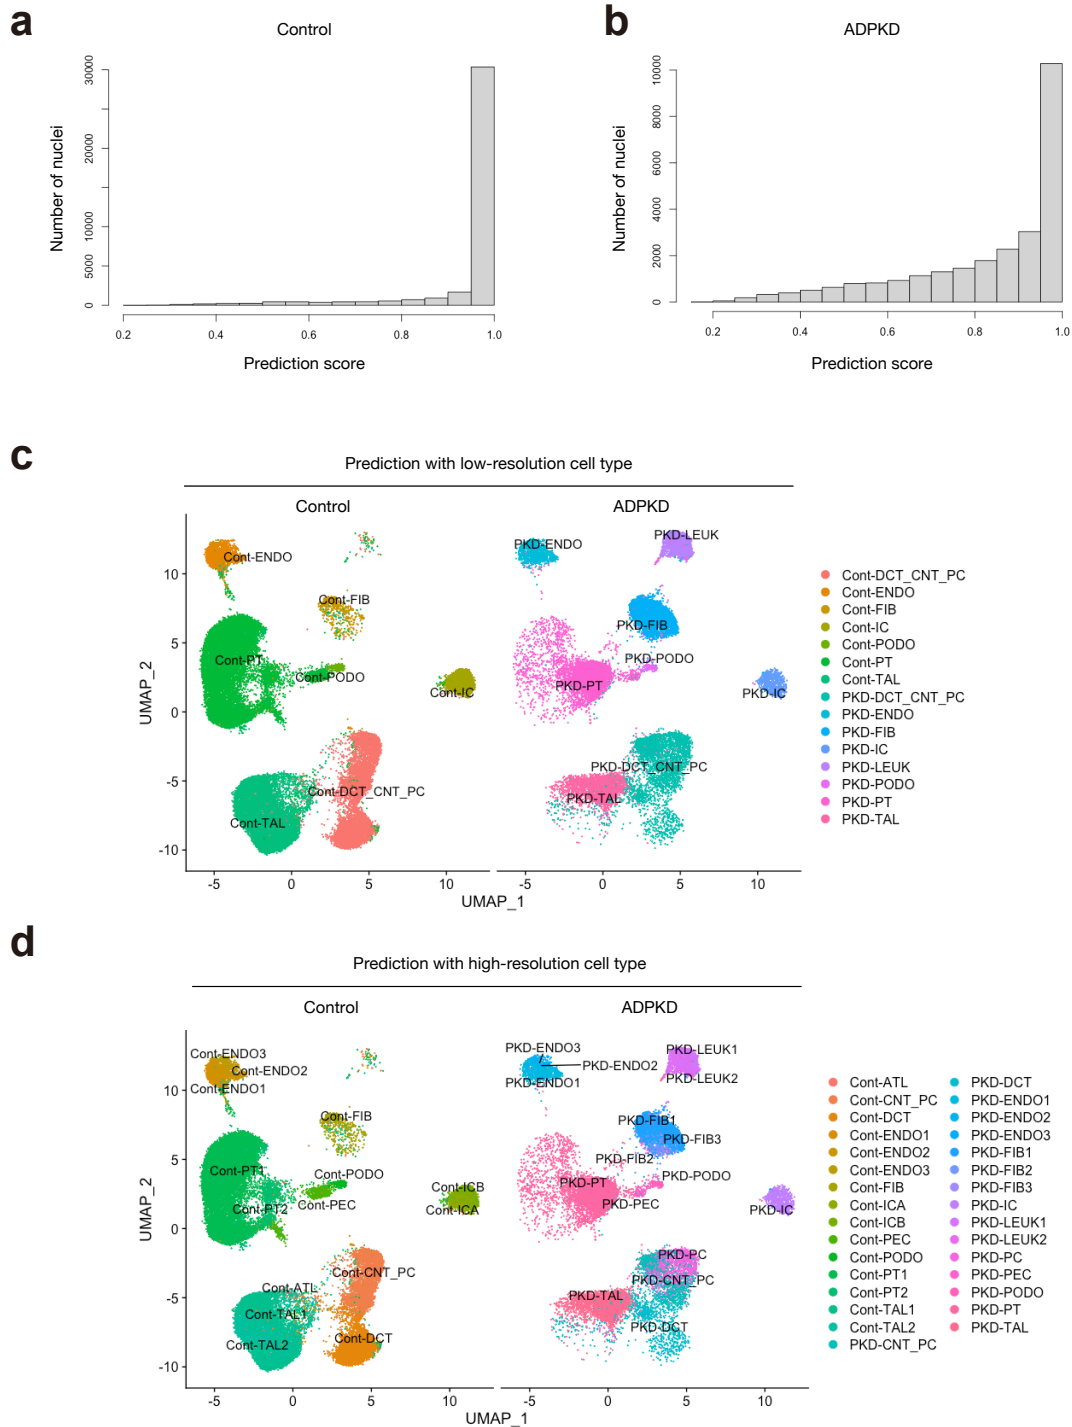

**Supplementary Figure 7. Most of nuclei in ADPKD and control kidneys were predicted with high confidence**

(a,b) Distribution of maximum prediction scores of nuclei calculated by the label transfer algorithm in Signac package for control (a) or ADPKD dataset (b). (c,d) UMAP plot of snATAC-seq dataset with predicted cell types through label transfer from snRNA-seq data with low-resolution cell types (c) or high-resolution cell types (d).

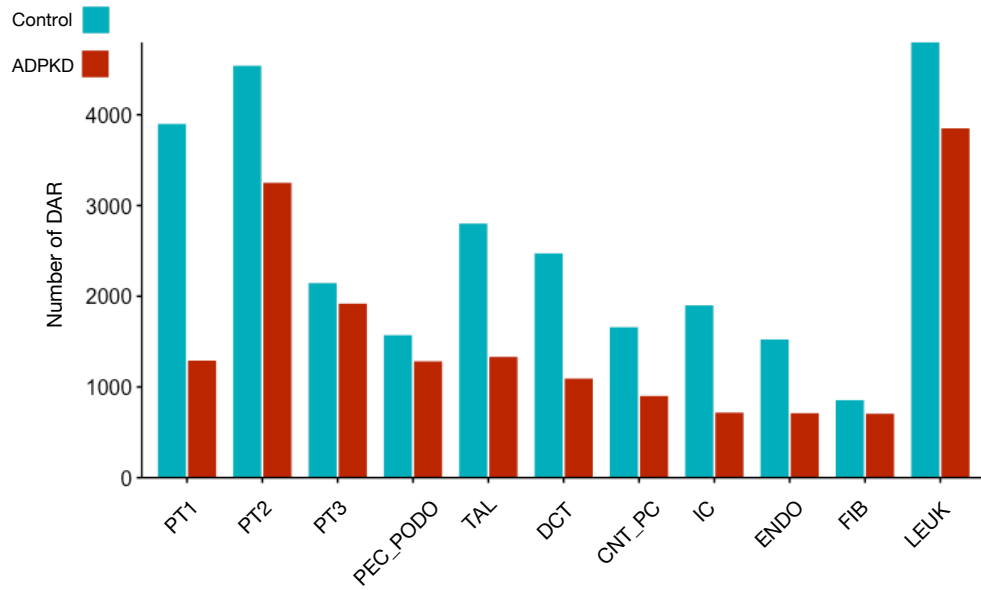

**Supplementary Figure 8. Number of DAR in each cell type of control or ADPKD snATAC-seq dataset:** Bar graph showing the difference of numbers of DAR between control (blue) and ADPKD (red). Source data are provided as a Source Data file.

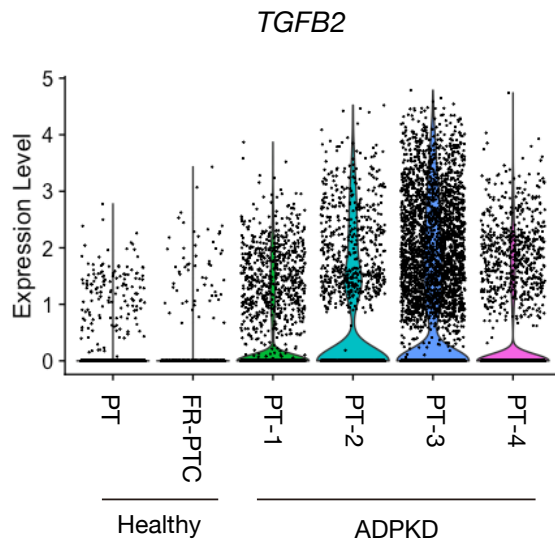

**Supplementary Figure 9. *TGFB2* expression was upregulated PT lineage in ADPKD kidneys:** A violin plot displaying *TGFB2* expression in PT subtypes among control or ADPKD kidney.

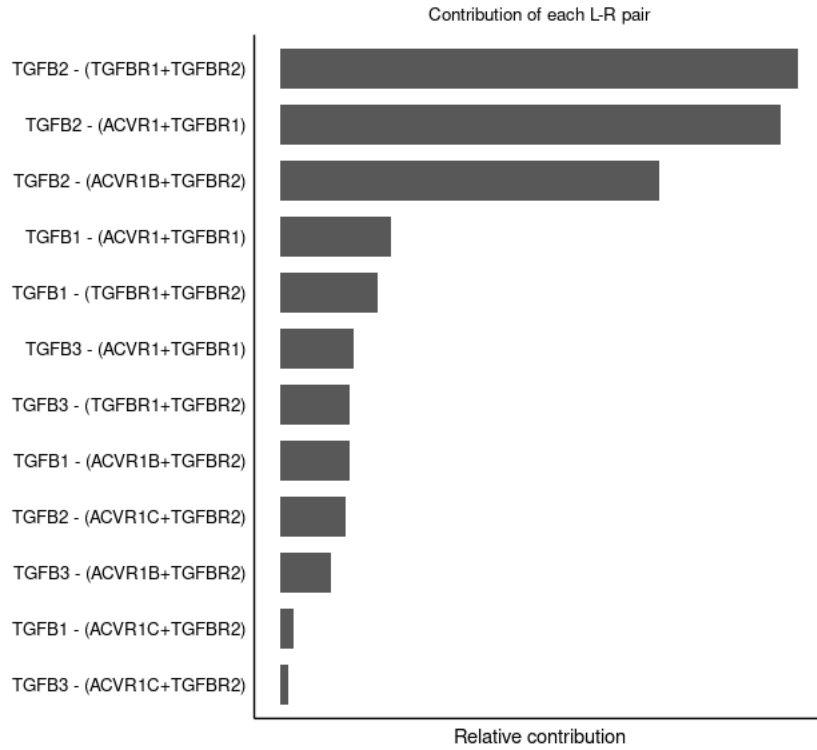

**Supplementary Figure 10. Contribution of each ligand-receptor pair in TGF $\beta$  signaling:** Bar plot showing relative contribution of each ligand-receptor pair in TGF $\beta$  signaling pathway.



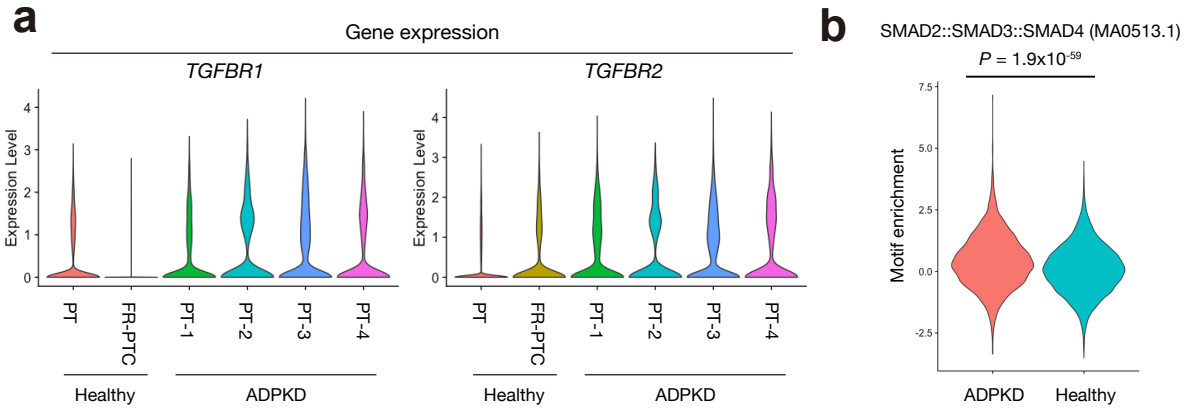

**Supplementary Figure 11. Up-regulation of TGF $\beta$  receptors in FR-PTC**

**(a)** Violin plot showing *TGFBR1* (left) or *TGFBR2* (right) gene expression among PT subtypes. **(b)** Violin plot showing SMAD2::SMAD3::SMAD4 binding motif (MA0513.1) enrichment score for PT lineage of ADPKD or control kidneys. Bonferroni adjusted p-values were used to determine significance.

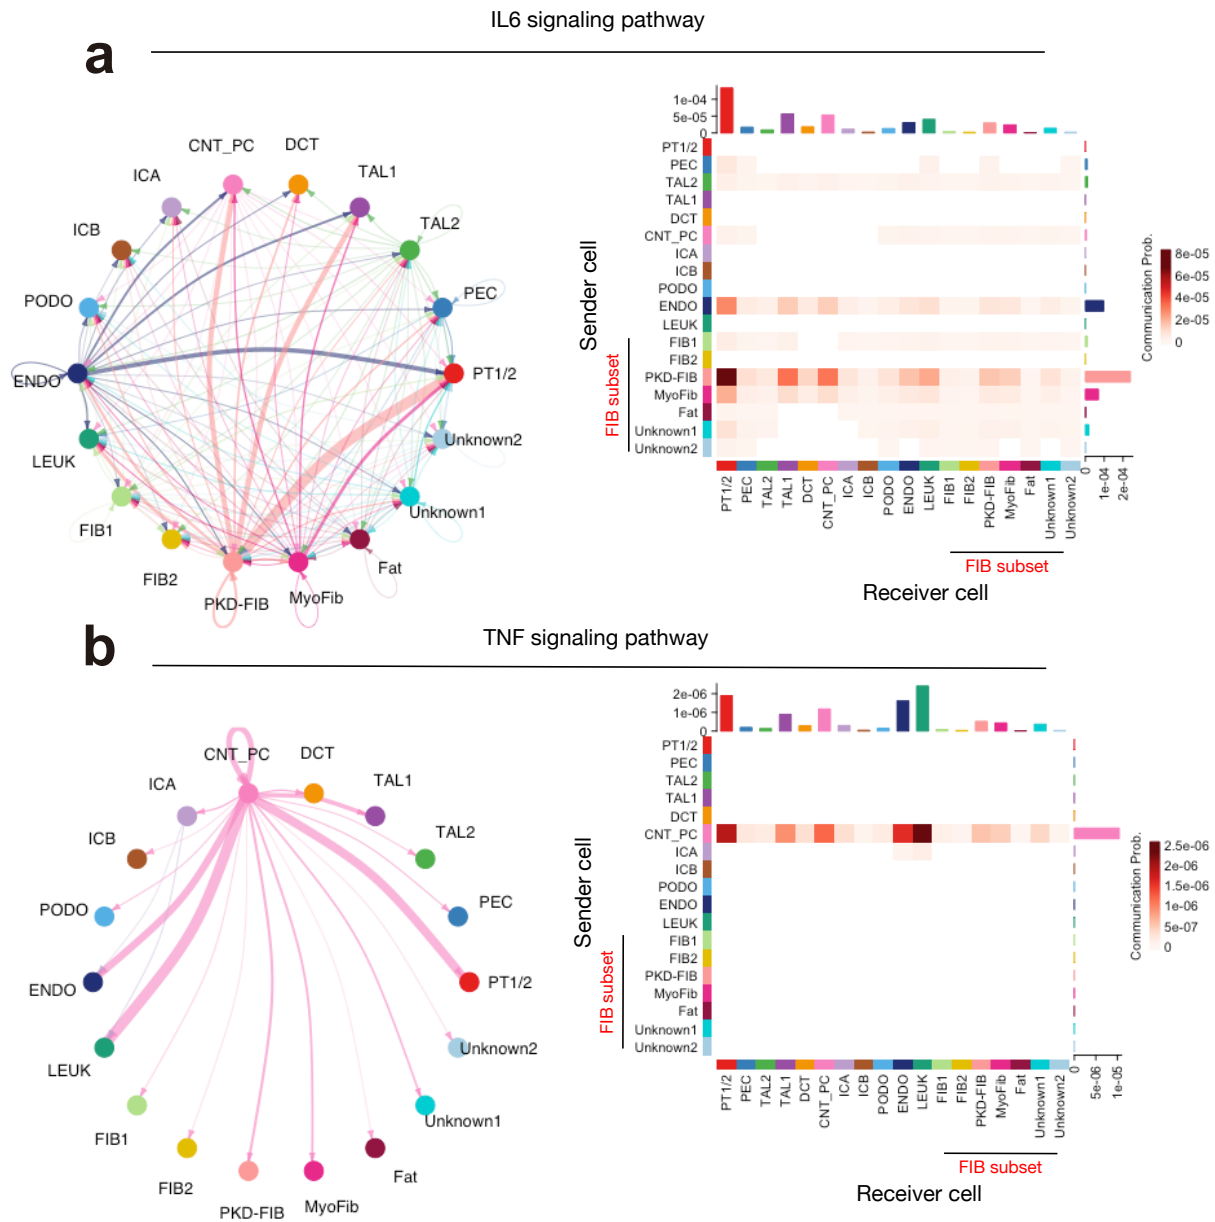

**Supplementary Figure 12. Ligand-receptor analysis on all cell types and FIB subtypes for proinflammatory signaling pathways:** Circle plot showing an inferred network (left) or heat map showing communication probabilities of signals from senders (secretors) to a receivers (targets) celltype (right) for IL6 signaling pathway (a) or TNF signaling pathway (b) among celltypes and FIB subtypes. Thickness of an arrow in a circle plot indicates interaction strength.

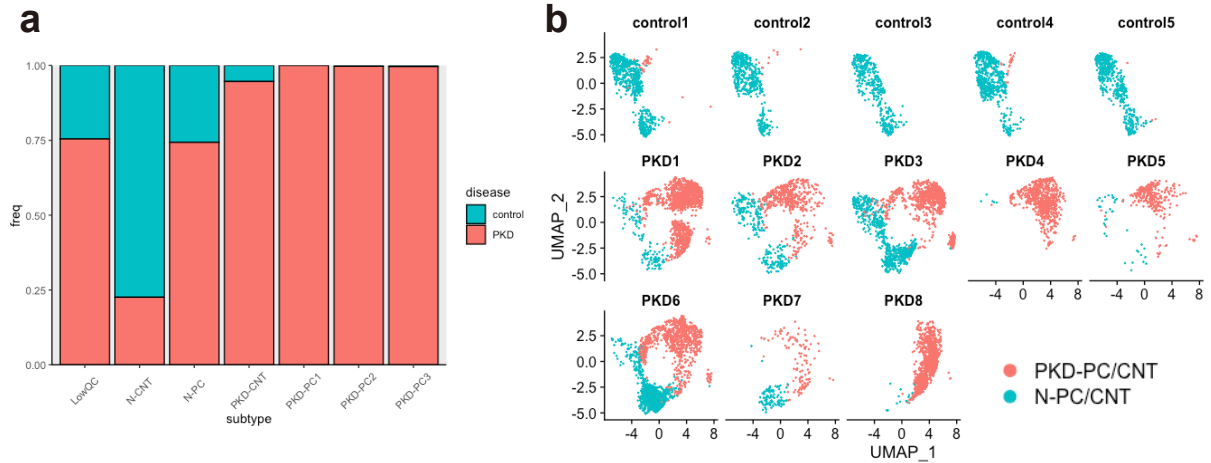

**Supplementary Figure 13. Overlap between ADPKD and control cells in CNT\_PC subclustering**

**(a)** Proportion of disease group (control and ADPKD) in each subtype of subclustering on CNT\_PC. **(b)** UMAP colored by subtypes, split by individual samples. PKD-PC/CNT: PKD-CDC1, 2, 3, and PKD-CNT. N-PC/CNT: N-PC and N-CNT. Source data are provided as a Source Data file.

**a**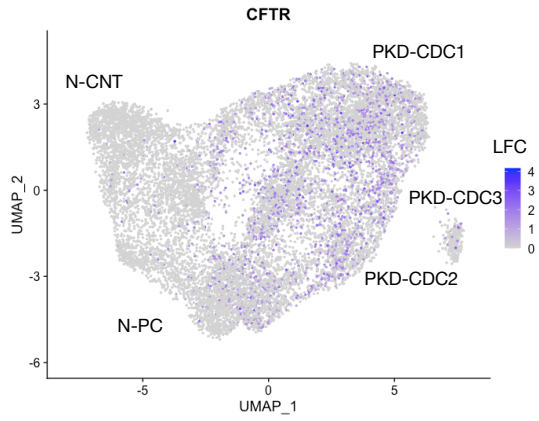**b**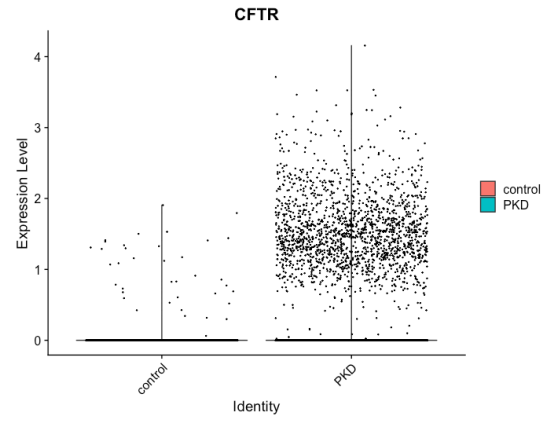

**Supplementary Figure 14. *CFTR* expressions in CNT\_PC subclustering analysis**

**(a,b)** *CFTR* expression in CNT\_PC subclusters displayed with UMAP plot **(a)** or violin plot comparing ADPKD and control cells **(b)**. The color scale for each plot represents a normalized log-fold-change (LFC).

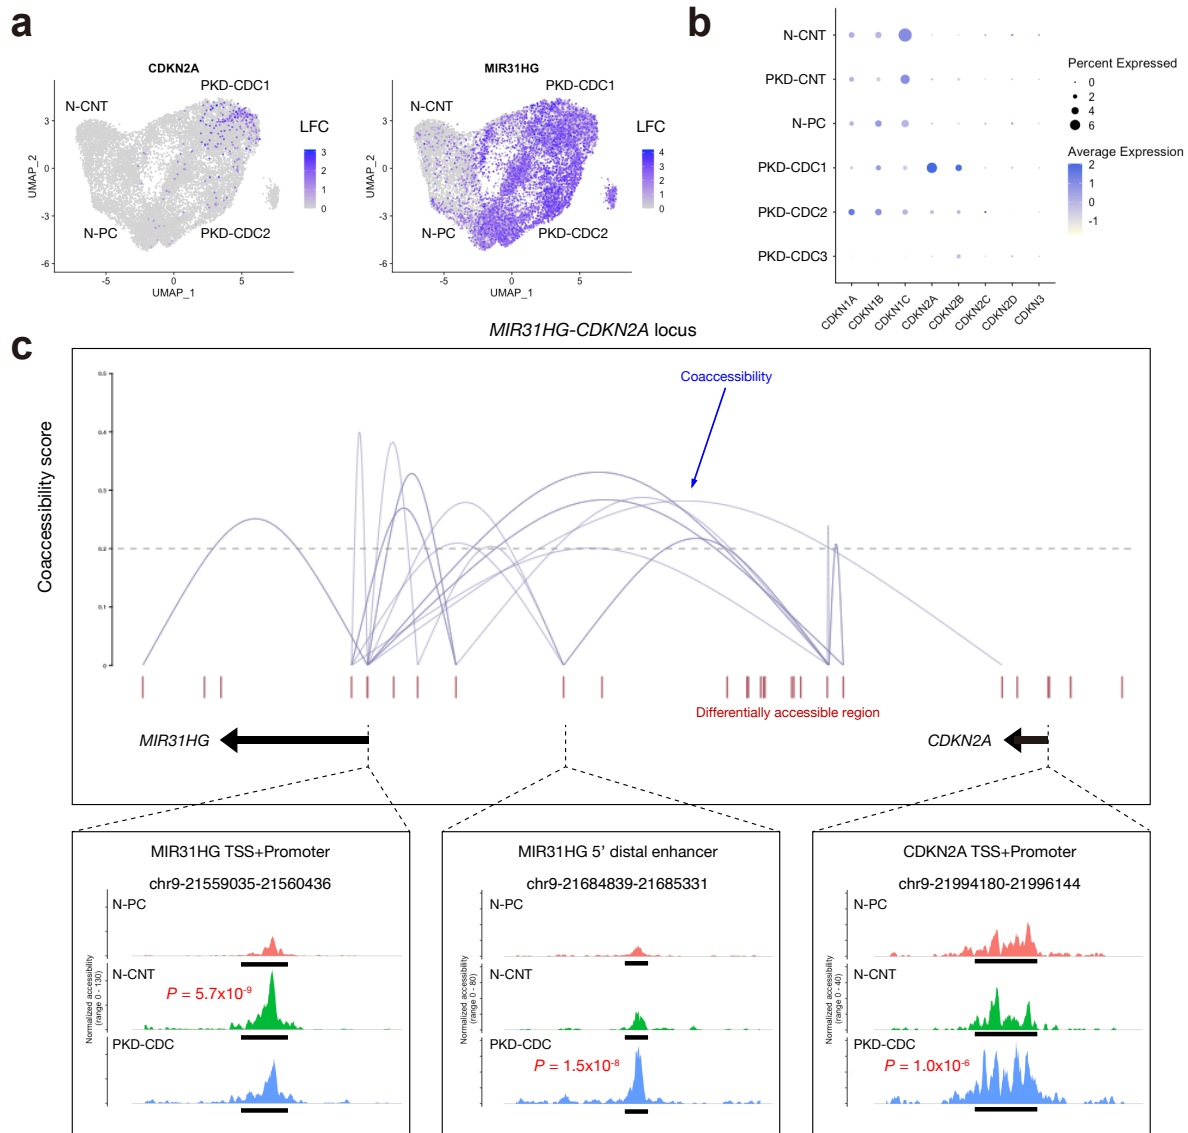

**Supplementary Figure 15. Multimodal approach identified anti-senescence gene enhancer activation in PC subpopulations in ADPKD**

(a) UMAP plot displaying *CDKN2A* (left) or *MIR31HG* (right) gene expression in the snRNA-seq. The color scale for each plot represents a normalized log-fold-change (LFC). (b) Dot plot showing gene expression patterns of the cyclin-dependent kinase inhibitor genes enriched in each of CNT\_PC subpopulations. The diameter of the dot corresponds to the proportion of cells expressing the indicated gene and the density of the dot corresponds to average expression relative to all CNT\_PC cells. (c) Cis-coaccessibility networks (CCAN, gray arcs) around the *MIR31HG* and *CDKN2A* gene in the ADPKD kidneys among accessible regions (red boxes) is shown (top). Fragment coverage (frequency of Tn5 insertion) around TSS (chr9:21559035-21560436) or 5' distal DAR (chr9:21684839-21685331) of *MIR31HG* and TSS of *CDKN2A* (chr9:21994180-21996144) are also shown (bottom, peak +/- 3 Kb). Bonferroni adjusted p-values were used to determine significance for differential accessibility.

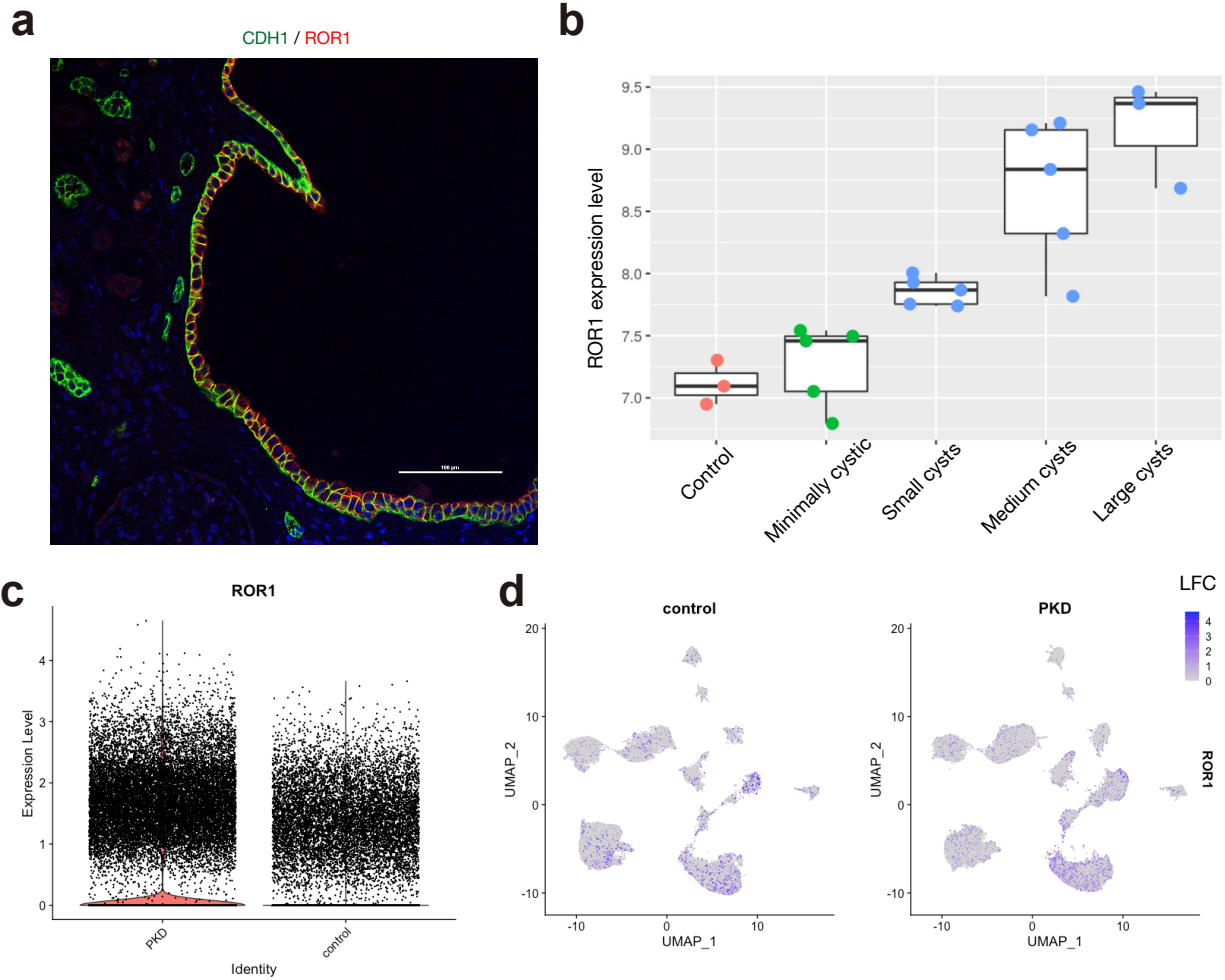

### Supplementary Figure 16. ROR1 expression in PC lineages of ADPKD kidneys

(a) Representative immunohistochemical images of ROR1 (red) and CDH1 (green) in the ADPKD kidneys. Scale bar indicates 100  $\mu\text{m}$ . (b) Correlation between *ROR1* expression and cyst size (GSE7869). Each dot represents a biological replicate for Control (n=3), Minimally cystic (n=5), Small cysts (n=5), Medium cysts (n=5) or Large cysts (n=3) of ADPKD patients. The data are presented as box-and-whisker plots depicting the median, quartiles and ranges. Source data are provided as a Source Data file. (c) Violin plot showing *ROR1* gene expression in ADPKD or control nuclei in all cell types. (d) UMAP plot displaying *ROR1* gene expression in the control dataset (left) or ADPKD dataset (right). The color scale for each plot represents a normalized log-fold-change (LFC).

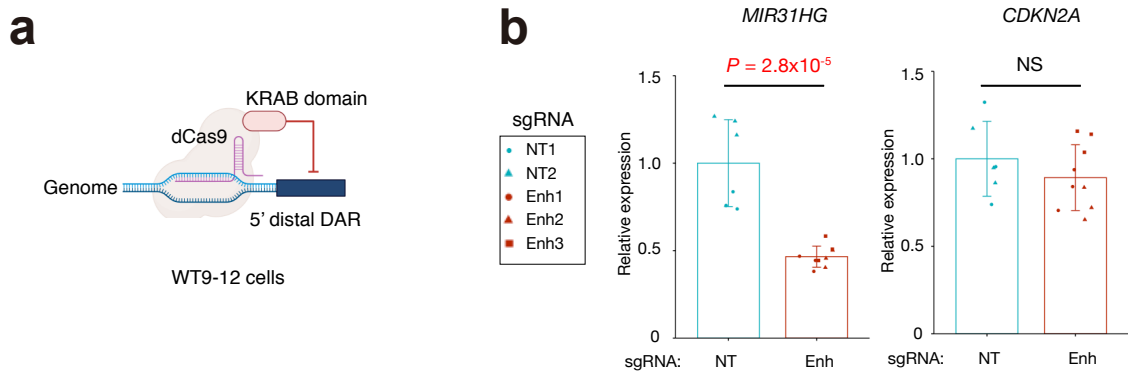

**Supplementary Figure 17. CRISPR interference on *MIR31HG* enhancer in cyst cell line**

(a) CRISPR interference targeting 5' distal DAR of *MIR31HG*. Schematic was created with BioRender.  
 (b) RT and real-time PCR analysis of mRNAs for *GPRC5A* or *CDKN2A* in the WT9-12 cells with CRISPRi targeting the 5' distal potential enhancer (Enh) for *GPRC5A* gene. NT, non-targeting control. Each group consists of n = 6 (2 sgRNAs with 3 biological replicates for NT) or n=9 (3 sgRNAs with 3 biological replicates for Enh) data point. Bar graphs represent the mean and error bars are the s.d. Two-tailed Student's *t*-test. Source data are provided as a Source Data file.



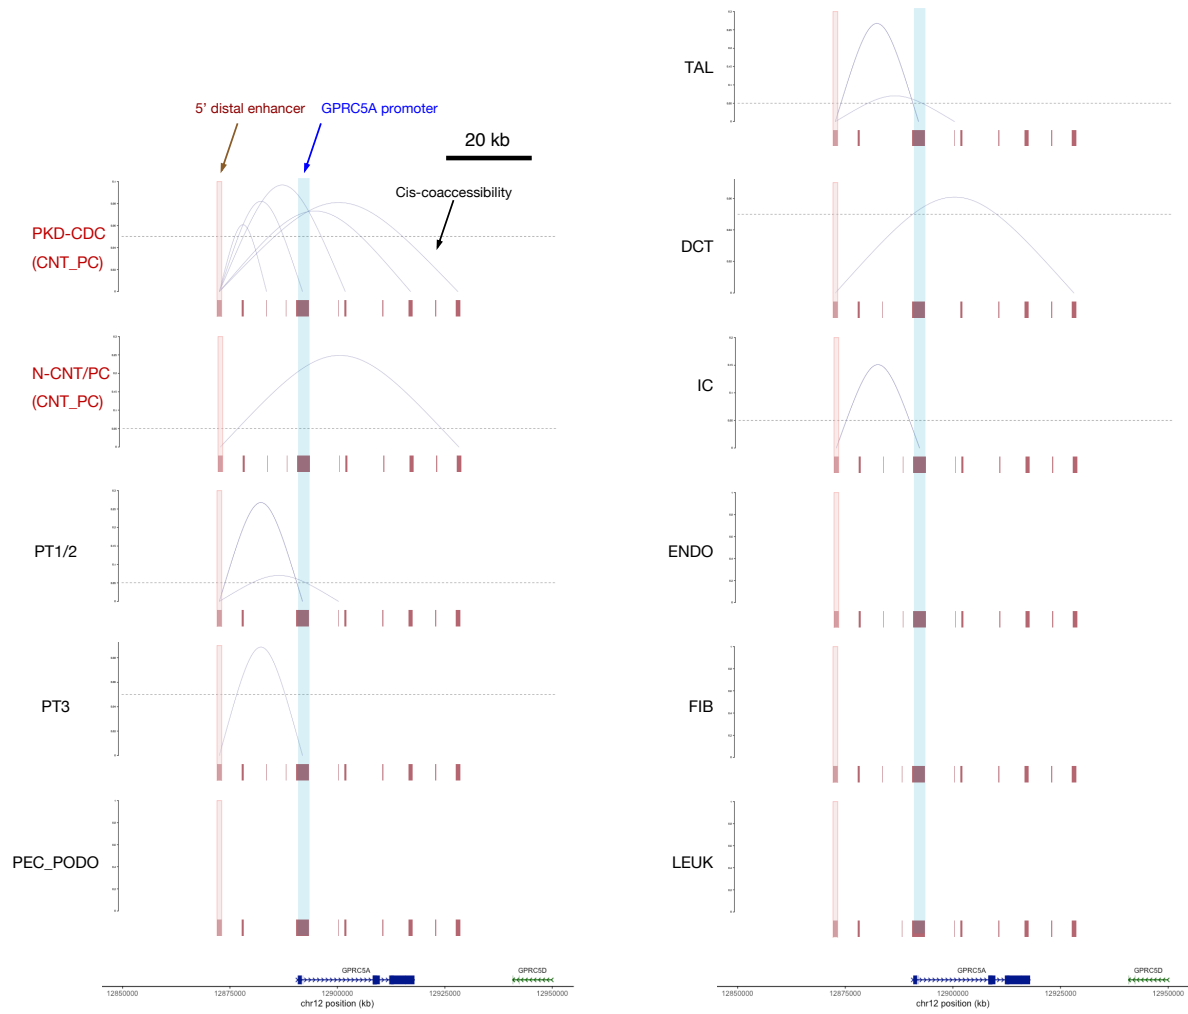

**Supplementary Figure 18. CCAN around *GPRC5A* locus in each cell type in ADPKD kidneys: Cis-coaccessibility around 5' distal enhancer (red boxes) and TSS of *GPRC5A* (blue column) in each celltype is shown.**

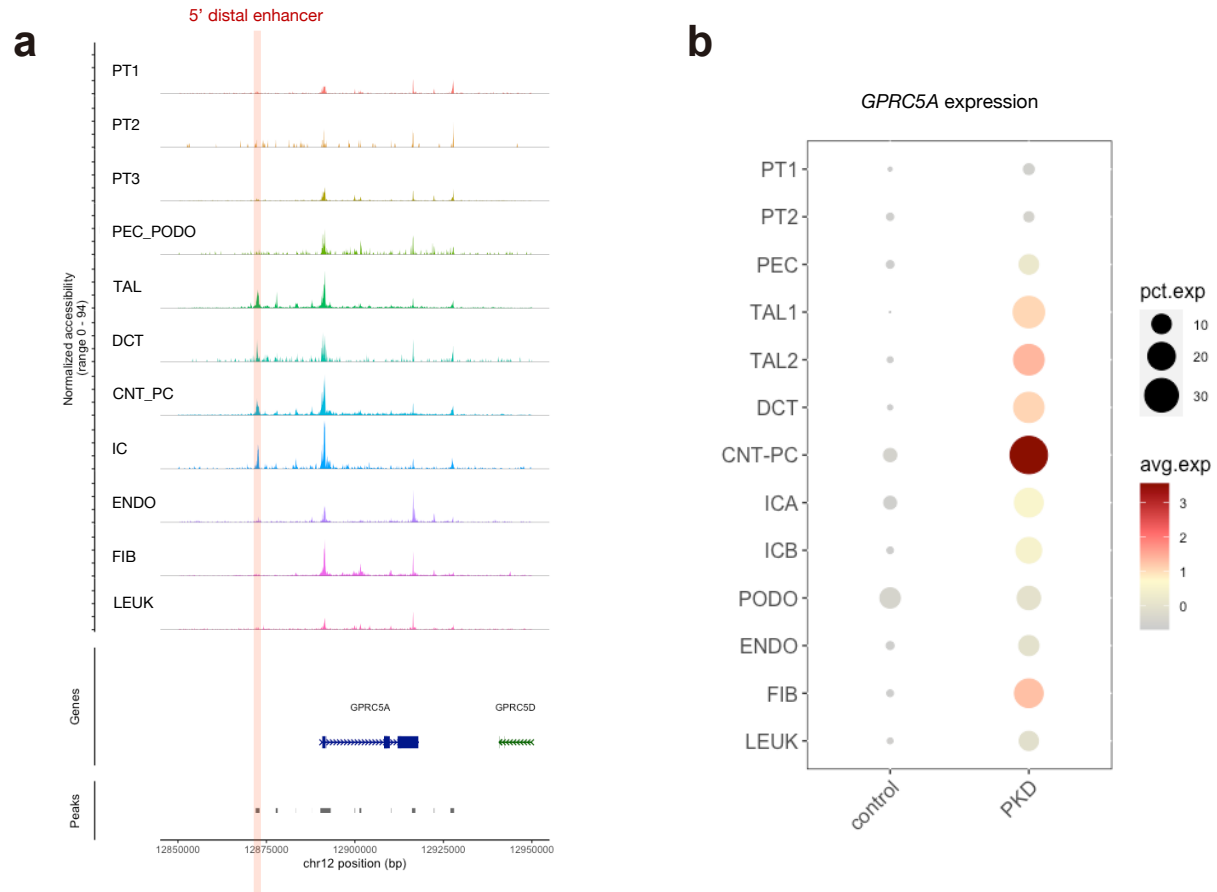

**Supplementary Figure 19. Gene expression or chromatin accessibility of 5' distal enhancer for *GPRC5A* in each cell type of ADPKD kidneys:** Accessibility on 5' distal enhancer of *GPRC5A* gene (red column, **a**) and dot plot showing *GPRC5A* expression in each celltype (**b**). The diameter of the dot corresponds to the proportion of cells expressing the indicated gene (pct. exp) and the density of the dot corresponds to average expression relative to all celltypes (avg. exp).

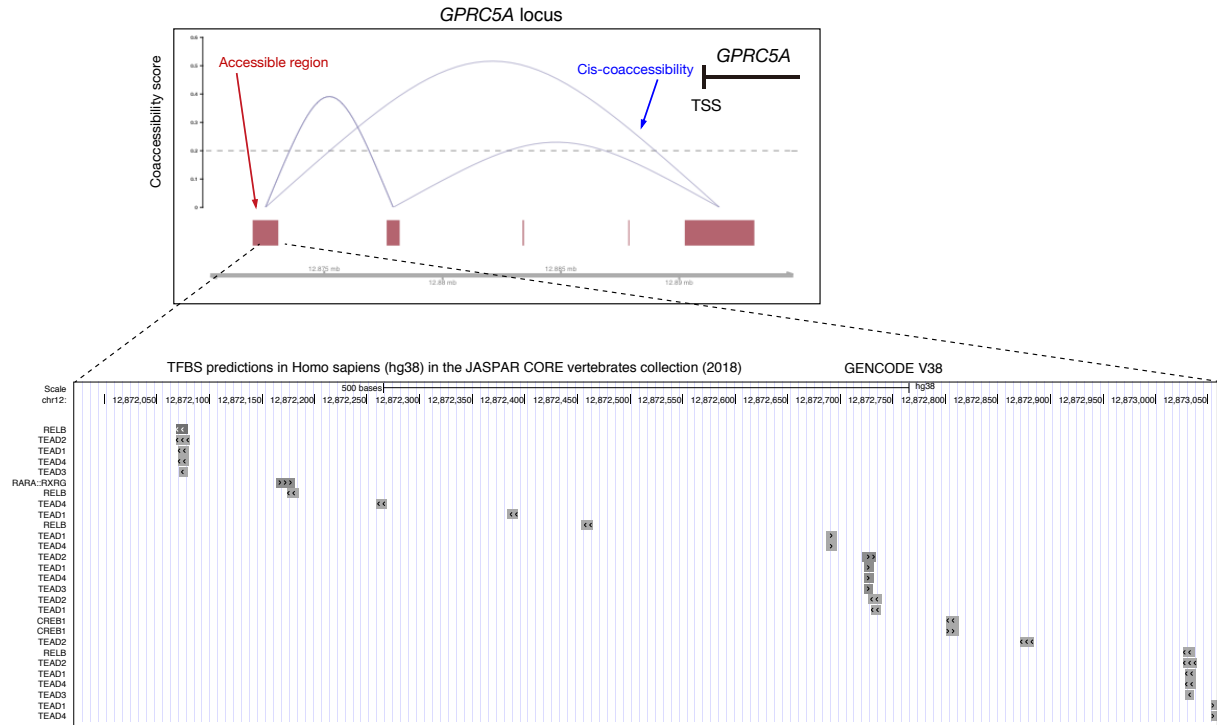

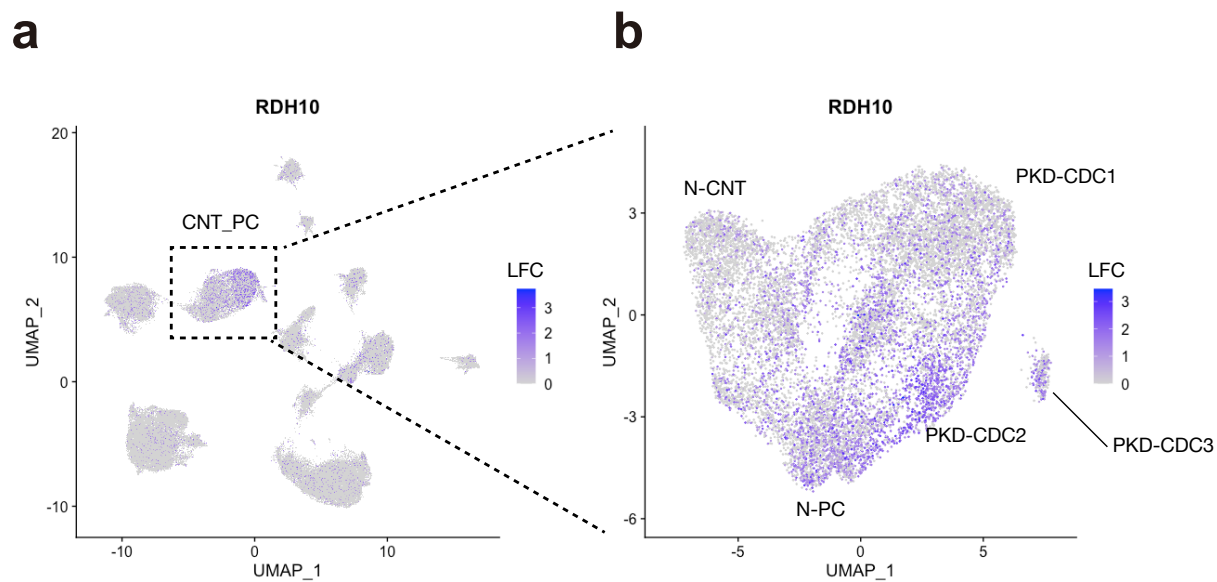

**Supplementary Figure 21. *RDH10* expression in principal cell lineages in ADPKD kidneys**

**(a,b)** UMAP plot displaying *RDH10* expression in the whole dataset **(a)** or CNT\_PC subclusters **(b)**. The color scale for each plot represents a normalized log-fold-change (LFC).

| Sample ID | Gender | Age   | eGFR (ml/min/1.73m <sup>2</sup> ) | Status prior to transplant | Duration of sample preservation (days) | Kidney size |
|-----------|--------|-------|-----------------------------------|----------------------------|----------------------------------------|-------------|
| PKD1      | Female | 50-60 | 7                                 | Dialysis                   | 810                                    | 1079 g      |
| PKD2      | Female | 50-60 | 17                                | Pre-emptive                | 1207                                   | 803 g       |
| PKD3      | Female | 50-60 | 17                                | Pre-emptive                | 216                                    | 1207 g      |
| PKD4      | Male   | 50-60 | 16                                | Pre-emptive                | 988                                    | 2061 g      |
| PKD5      | Female | 60-70 | 23                                | Pre-emptive                | 535                                    | 1094 g      |
| PKD6      | Male   | 30-40 | 14                                | Pre-emptive                | 549                                    | 3170 g      |
| PKD7      | Male   | 40-50 | 10                                | Pre-emptive                | 629                                    | 2100 g      |
| PKD8      | Male   | 40-50 | 5                                 | Pre-emptive                | 570                                    | 1531 g      |

**Supplementary Table 1. Patient demographics and clinical information abstracted from the medical record**

eGFR, estimated glomerular filtration rate. Status prior to transplant, whether the patient was on maintenance dialysis or not (pre-emptive transplantation). Duration of sample preservation, duration (days) between sample collection and snRNA-seq library preparation.

| snRNA-seq | Control |           | ADPKD  |           |
|-----------|---------|-----------|--------|-----------|
|           | Number  | Frequency | Number | Frequency |
| PT1+PT2   | 10523   | 25.9%     | 12649  | 20.4%     |
| PEC       | 869     | 2.1%      | 1634   | 2.6%      |
| TAL1      | 13030   | 32.1%     | 11253  | 18.1%     |
| TAL2      | 852     | 2.1%      | 1265   | 2.0%      |
| DCT       | 6225    | 15.3%     | 4060   | 6.5%      |
| CNT_PC    | 3747    | 9.2%      | 11143  | 18.0%     |
| ICA       | 1096    | 2.7%      | 1900   | 3.1%      |
| ICB       | 1014    | 2.5%      | 361    | 0.6%      |
| PODO      | 624     | 1.5%      | 1585   | 2.6%      |
| ENDO      | 1693    | 4.2%      | 3829   | 6.2%      |
| FIB       | 625     | 1.5%      | 8244   | 13.3%     |
| LEUK      | 339     | 0.8%      | 4064   | 6.5%      |
| URO1      | 0       | 0.0%      | 65     | 0.1%      |
| URO2      | 0       | 0.0%      | 21     | 0.0%      |
| Total     | 40637   | 100%      | 62073  | 100%      |

**Supplementary Table 2. The number or frequency of nuclei for each cell type quantitated in the whole filtered snRNA-seq dataset:** PT, proximal tubule; PEC, parietal epithelial cells; TAL, thick ascending limb of Henle's loop; DCT, distal convoluted tubule; CNT\_PC, connecting tubule and principle cells, ICA, Type A intercalated cells; ICB, Type B intercalated cells; PODO, podocyte; ENDO, endothelial cells; FIB, fibroblasts; LEUK, leukocytes; URO, uroepithelium.

| snATAC-seq | Control |           | ADPKD  |           |
|------------|---------|-----------|--------|-----------|
|            | Number  | Frequency | Number | Frequency |
| PT1        | 9176    | 27.3%     | 829    | 4.8%      |
| PT2        | 3537    | 10.5%     | 96     | 0.6%      |
| PT3        | 1198    | 3.6%      | 3119   | 18.0%     |
| PEC_PODO   | 746     | 2.2%      | 292    | 1.7%      |
| TAL        | 9289    | 27.6%     | 3406   | 19.6%     |
| DCT        | 3095    | 9.2%      | 287    | 1.7%      |
| CNT_PC     | 3036    | 9.0%      | 2765   | 15.9%     |
| IC         | 1509    | 4.5%      | 615    | 3.5%      |
| ENDO       | 1480    | 4.4%      | 1037   | 6.0%      |
| FIB        | 498     | 1.5%      | 3241   | 18.7%     |
| LEUK       | 57      | 0.2%      | 1678   | 9.7%      |
| Total      | 33621   | 100.0%    | 17365  | 100.0%    |

**Supplementary Table 3. The number or frequency of nuclei for each cell type quantitated in the whole filtered snATAC-seq dataset:** PEC-PODO, parietal epithelial cells and podocyte; TAL, thick ascending limb; DCT, distal convoluted tubule; CNT\_PC, connecting tubule and principle cells, ICA, Type A and TypeB intercalated cells; ENDO, endothelial cells; FIB, fibroblasts; LEUK, leukocytes.



| <b>Donor</b> | <b>Total RNA reads</b> | <b>RNA reads per cell</b> | <b>Total ATAC reads</b> | <b>ATAC fragments per cell</b> |
|--------------|------------------------|---------------------------|-------------------------|--------------------------------|
| Control_1    | 243,702,726            | 27,226                    | 343,687,555             | 13,892                         |
| Control_2    | 474,983,824            | 30,658                    | 269,154,397             | 12,611                         |
| Control_3    | 212,996,173            | 22,783                    | 396,525,222             | 17,493                         |
| Control_4    | 977,094,922            | 73,782                    | 314,024,252             | 10,567                         |
| Control_5    | 132,744,441            | 13,696                    | 267,097,032             | 10,168                         |
| ADPKD_1      | 297,480,919            | 24,616                    | 324,886,233             | 9,755                          |
| ADPKD_2      | 460,253,422            | 31,274                    | 372,923,215             | 39,809                         |
| ADPKD_3      | 370,314,010            | 31,171                    | 374,516,045             | 26,190                         |
| ADPKD_4      | 334,024,895            | 22,458                    | 253,540,663             | 9,233                          |
| ADPKD_5      | 303,934,085            | 28,312                    | 282,728,864             | 11,359                         |
| ADPKD_6      | 422,011,072            | 25,609                    | 348,954,290             | 27,627                         |
| ADPKD_7      | 307,102,696            | 93,429                    | 518,627,214             | 34,513                         |
| ADPKD_8      | 372,678,869            | 101,520                   | 201,042,995             | 14,884                         |

**Supplementary Table 4. The numbers of total reads and reads per nucleus in snRNA-seq and snATAC-seq data:** Total reads and reads per cell in snRNA-seq and snATAC-seq data were shown.

| <b>Quality Control for snRNA libraries</b> |                              |                                          |
|--------------------------------------------|------------------------------|------------------------------------------|
| <b>Donor</b>                               | <b>Sequencing Saturation</b> | <b>Fraction reads with Valid Barcode</b> |
| Control_1                                  | 52.6                         | 55.8                                     |
| Control_2                                  | 49.7                         | 64.7                                     |
| Control_3                                  | 39.5                         | 48.0                                     |
| Control_4                                  | 65.7                         | 51.8                                     |
| Control_5                                  | 30.4                         | 49.1                                     |
| ADPKD_1                                    | 45.4                         | 38.4                                     |
| ADPKD_2                                    | 44.2                         | 41.2                                     |
| ADPKD_3                                    | 46.6                         | 40.1                                     |
| ADPKD_4                                    | 57.7                         | 36                                       |
| ADPKD_5                                    | 34.1                         | 37.9                                     |
| ADPKD_6                                    | 44.5                         | 44.5                                     |
| ADPKD_7                                    | 73.8                         | 25.9                                     |
| ADPKD_8                                    | 77.4                         | 31.5                                     |

**Supplementary Table 5 – Quality control for snRNA-seq libraries:** The library complexity for the snRNA libraries was estimated with sequencing saturation for each donor. The fraction of read with a valid barcode in each donor.

| <b>Quality Control for snATAC libraries</b> |                              |                                          |
|---------------------------------------------|------------------------------|------------------------------------------|
| <b>Donor</b>                                | <b>Sequencing Saturation</b> | <b>Fraction reads with Valid Barcode</b> |
| Control_1                                   | 36.2                         | 98.3                                     |
| Control_2                                   | 35.1                         | 98.3                                     |
| Control_3                                   | 37.1                         | 98.3                                     |
| Control_4                                   | 41.1                         | 95.8                                     |
| Control_5                                   | 37.3                         | 95.8                                     |
| ADPKD_1                                     | 25.6                         | 95.4                                     |
| ADPKD_2                                     | 40.5                         | 97.1                                     |
| ADPKD_3                                     | 31.9                         | 97.7                                     |
| ADPKD_4                                     | 17.4                         | 95.8                                     |
| ADPKD_5                                     | 32.7                         | 95.8                                     |
| ADPKD_6                                     | 27.1                         | 96.9                                     |
| ADPKD_7                                     | 49                           | 97.2                                     |
| ADPKD_8                                     | 28.4                         | 85.8                                     |

**Supplementary Table 6 – Quality control for snATAC-seq libraries:** The sequencing saturation and the fraction of reads with a valid barcode in each donor were shown.

| <b>Sequence for sgRNA</b> |                      |                         |
|---------------------------|----------------------|-------------------------|
| sgRNA name                | sgRNA sequence       | Targeted region (hg38)  |
| GPRC5A-Enhancer #1        | ACCTTCAGGGTCGCCTAACT | chr12:12872920-12872939 |
| GPRC5A-Enhancer #2        | TCTACCGGTTTATGTGTATA | chr12:12872506-12872525 |
| GPRC5A-Promoter #1        | TAAAGGCGGCCCTCGCCGGA | chr12:12891517-12891536 |
| GPRC5A-Promoter #2        | TCGGAGGAGTCCGATGCGCT | chr12:12891297-12891316 |
| MIR31HG-Enhancer #1       | AGTCATACACCTTGAATGGT | chr9:21684880-21684899  |
| MIR31HG-Enhancer #2       | CGGCAACAGCCCCTTAATGT | chr9:21685189-21685208  |
| MIR31HG-Enhancer #3       | CATATTTACTGTTAACACGA | chr9:21684789-21684808  |
| Non-targeting #1          | GGTAAGCGCGTGAGTCGAA  | NA                      |
| Non-targeting #2          | GAGGCGAGGTAAGACGCGG  | NA                      |

**Supplementary Table 7 – Sequence for sgRNA expression**
